# Supplementary material for: Birth to Three Matters
Source: Atypon-hosted journal article supplement (doi:10.1176/appi.ajp.2014.13101411), 2004-12-01
Supplement: appi.ajp.2014.13101411.ds001.pdf [file appi.ajp.2014.13101411.ds001.pdf]

## **Supplementary Methods**

**Subject Recruitment.** Participants completed the Structured Clinical Interview for Diagnostic (SCID patient or nonpatient versions) to yield Diagnostic and Statistical Manual of Mental Disorders-IV (DSM-IV) (1) diagnoses. Probands met criteria for schizophrenia (SZ), schizoaffective (SZA) or psychotic bipolar disorder (PBP) as defined in (2)). Healthy comparison individuals (HC) were free of any lifetime psychosis and Axis 1 disorders according to the DSM IV. Participants were recruited at the five BSNIP sites via advertisements (see Table S1), online postings, and referral by word of mouth and local National Association on Mental Illness (NAMI) chapters. All subjects were assessed by experienced clinical raters including masters-level clinicians, doctoral-level clinical psychologists or psychiatrists to document diagnostic information using clinical data and structured interviews. Probands were administered the Positive and Negative Symptom Scale (PANSS (3)), the Young Mania Rating Scale (4), the Montgomery Asberg Depression Rating Scale (MADRS (5)), and the Global Assessment of Functioning scale (GAF; axis V of DSM-IV). Exclusion criteria included central neurological illness, mental retardation, current substance abuse based on toxicology and urine screening, past abuse within 6 months or dependence within 2 years or any prior extensive history of drug dependence (DSM-IV). Probands were on stable doses of psychotropic medication (Table S2) for  $\geq 4$  weeks.

**Experimental Design for Auditory Oddball Paradigm.** The auditory oddball task consisted of two different pitches; high (1500 Hz db) target and low standard (1000 Hz) tones. Stimulus duration was 50 ms with rise and decay of 10 ms. The interstimulus interval was 1300 ms, with stimuli comprising of 567 standard (85%) and 100 target tones (15%) presented in pseudorandom order. Participants were seated in a quiet electrically shielded booth (ambient sound = 61–63 dB; luminance = .11–.12 foot-candles) fixating at a computer monitor with cross hair, while listening to the tones delivered by headphone. Subjects were instructed to press a button with their right index finger when a target tone was detected. Uniformity in recording conditions was preserved across sites, which also used identical recording equipment and stimulus presentations.

**Auditory Oddball Electroencephalogram (EEG) Data Acquisition.** EEG was collected continuously from Neuroscan equipment equipped with 64 Ag/AgCl electrodes (Quik-Cap, Compumedics, El Paso, Texas). Electrode impedances were maintained  $< 5 \text{ K}\Omega$  throughout the experiment. Electrodes were placed according to the International 10-10 EEG system (Figure S1). Eye movement recordings were collected by placing one electrode at the inner and outer canthi of the left and right eye. Nose served as a reference with a forehead ground. EEG recordings were amplified with a gain of 12,500 and digitized at a sampling rate of 1000 Hz using Neuroscan ACQUIRE and SynAmps 2 recording systems (Compumedics Neuroscan).

**Structural Magnetic Resonance Imaging (sMRI) Data.** We extracted 68 cortical and 14 subcortical brain volumes using sMRI data in 369 subjects (89 HC, 114 SZ and 166 PBP out of 449 subjects) (6) using FreeSurfer (7) version 5.347.

(<http://surfer.nmr.mgh.harvard.edu/fswiki/FreeSurferMethodsCitation>). High-resolution isotropic T1-weighted MPRAGE sequences (TR=6.7 msec, TE= 3.1 msec, 80 flip angle, 256x240 matrix

size, total scan duration=10:52.6 minutes, 170 sagittal slices, 1mm slice thickness, 1x1x1.2 mm<sup>3</sup> voxel resolution) were obtained following the Alzheimer's Disease Neuroimaging Initiative (<http://www.loni.ucla.edu/ADNI>) protocol.

**Event-Related Potential (ERP) Data Processing.** Raw EEG data were checked and adjusted for bad electrodes (< 5% for any subject) using spherical spline interpolation (BESA 5.3; MEGIS Software, Grafelfing, Germany). Data were subjected to blink and cardiac artifact removal by using independent component analysis (8). Data were segmented into epochs from 250 msec before to 720 msec after stimulus onset and digitally filtered between 0.5 Hz-55 Hz (zero-phase filter; roll-off: 6 and 48 dB/octave, respectively). Epochs were baseline corrected using mean voltage activity during 250 ms prestimulus period and excluded from analysis if voltage > 75  $\mu$ V at any electrode; at least 60% of trials were accepted for all subjects.

**Spatial Principal Component Analysis.** EEG data from the 64 channels were effectively compressed and summarized using spatial principal components analysis (PCA) on grand average data (9, 10) implemented using BESA (MEGIS Software) and Matlab (The Mathworks, Natick, Massachusetts) to identify spatial patterns in the EEG topography (Refer to article (9) for details). Each electrode was averaged for both target and standard conditions and PCA with promax oblique vector rotation and Kaiser (11) normalization was applied on a 64 x 64 sensor covariance matrix (98 time points as observations for 64 sensors) for each condition separately. Based on eigenvalues, two target components (accounting for 65.7% and 29.6% of the variance) and one standard component (86.8% of the variance) were identified. For the target and standard condition, component weights were multiplied by each subject's grand average data, summed across sensors, and normalized by the sum of the component weights, yielding one waveform per component for each subject. The two target components comprised a late parietal (P3b) and early

frontal topography respectively and the standard component had an early frontal topography (Figure 1 in the text). The reduced component waveforms were concatenated (standard waveform followed by parietal target and frontal target) to yield a single phenotype vector for each subject for the multivariate genetic association analysis.

**Single Nucleotide Polymorphism (SNP) Data Processing.** Genotyped SNP data typically represented as homozygous (AA, BB) and heterozygous (AB or BA) were converted to numerical format by additive coding for the number of minor alleles (AA = 0, AB=1 and BB=2, assuming B is minor allele). Figure S2 illustrates the processing pipeline (12) for SNP data quality control using Plink (13). Raw SNP data were inspected for poorly genotyped subjects by checking for discordant sex, elevated missing rate (> 3%), unusual heterozygosity (> 3 SD from mean) and unusual similarity or relatedness between individuals. Individuals failing quality control were removed. Further, individual markers were removed, if marker missing rate was > 5%, rare variants with minor allele frequency < 0.05 and SNP correlated above 0.8 in block sizes of 200. Additional exclusion criteria included failure of Hardy Weinberg equilibrium ( $p < 0.00001$ ) and significantly differing genotype call rates between cases (SZ and PBP probands) and healthy comparison subjects (HC) ( $p < 0.00001$ ). Missing SNP data were imputed using the most frequent genotype. Finally, SNP data were corrected for population stratification bias by extracting the components contributing to the ethnicity structure using PCA (see q-q plot in Figure S3). In the current sample, the top three PCA components were significantly associated ( $p = 2.3 \times 10^{-273}$ ,  $p = 7.03 \times 10^{-91}$  and  $p = 2.66 \times 10^{-93}$ ) with self-reported ethnicity, but no significant case-control difference was detected. A total of 575,687 SNP were retained from the quality control process for the initial univariate analyses that further reduced the marker size for multivariate association.

Para-ICA like any other multivariate approach is limited by the high dimensionality posed by the numerous variables in the model that degrade the cumulative signal level from the linear combination of SNPs due to the disproportion between the SNPs to the observation cases. To overcome this problem, we applied univariate analysis using logistic regression to each of the 575,687 markers between cases and HC, similar to the strategy employed in a recent study (14). The regression was conducted separately for SZ and PBP probands vs HC. SNPs that passed a nominal  $p < 0.05$  uncorrected threshold from either of the two univariate analyses were combined and then queried using online databases dbSNP (<http://www.ncbi.nlm.nih.gov/SNP/>) and genome variation server (<http://gvs.gs.washington.edu/GVS137/>) to determine the functional annotation for each marker. Finally, 20,329 SNPs from coding and non-coding regions of the gene with nominal  $p < 0.05$  uncorrected significance level from the regression analyses were selected for the parallel independent component analysis (Para-ICA) based association in conjunction with ERP data.

**Para-ICA based SNP-ERP Association.** The genetic SNP and ERP data were jointly analyzed using the Para-ICA method (15) implemented in the fusion ICA toolbox V2.0c (<https://icarb.sourceforge.net>) developed in Matlab. Para-ICA estimates independent components on the genetic and the ERP data and jointly evaluates the association between the two data modalities (Figure S4). This approach is an extension of the common ICA technique to two data modalities or features, by including an additional constraint of maximizing the correlation between the two modalities, while simultaneously maximizing the independence on each feature using information theoretic based entropy cost function. Para-ICA is a statistically efficient data-driven multivariate technique that linearly combines multiple gene variants yielding a cumulative entity that is linked simultaneously to linearly related complex phenotypes. Unlike univariate

genome wide association tests, the complex phenotype can include multiple biological measures. Para-ICA parses the underlying structure or pattern in both the genetic and phenotype data mixture and relates them. Para-ICA offers various advantages: 1) data-driven analysis without prior assumptions on the underlying data distribution. 2) separation of unstructured complex noise sources from true biological signals producing better signal-to-noise ratio 3) efficiency in handling large scale data especially when fusing multiple data domains by data reduction, yielding statistical predictive efficacy by accounting for multiple comparison on reduced factors.

The ERP data matrix (N=449 X 294 (3x98 time points)) was formed by concatenating the PCA-compressed components including one standard and 2 target waveforms for each subject. The number of components for the pooled concatenated ERP data (data from SZ, PBP and HCs) was estimated to be 8 based on the minimum descriptor length criteria (16), a common method used in prior ICA based studies (17). The SNP data was organized as a matrix of subjects by SNPs (N=449 X 20329). For the pooled SNP data, the number of independent components was selected as 11 based on the consistency tool that checked for the maximum reliability of the components (18). A leave-one-out cross validation was conducted using the same parameters used in the original run to assess the reliability of SNP and ERP components. The ERP and SNP component in the each significantly associated pair from the original run was correlated with components from each run of the leave-one-out analysis (n=449). The component in each modality in each run that best matched the original pair was identified based on correlation. The average within modality correlation from different runs for each significantly associated pair was used as the final reliability index.

**Pathway Analysis.** The enrichment analysis determined the hierarchical processes including biological and metabolic attributes underlying the genes with reference to predefined pathway

maps and gene ontologies (GO) repository available in GeneGo. Statistical significance levels quantifying the enrichment were estimated using hypergeometric distribution based on the likelihood that significant genes were over-regulated in specific pathways and processes. Significance values were adjusted for multiple comparisons using false discovery rate correction.

**TABLE S1.** Demographic Information for Schizophrenia and Psychotic Bipolar Probands and Healthy Comparison Subjects

| Variable                    | Healthy comparison subjects (N=95) |       | Schizophrenia (N=144) |        | Psychotic bipolar disorder (N=210) |        | p         |
|-----------------------------|------------------------------------|-------|-----------------------|--------|------------------------------------|--------|-----------|
|                             | Mean                               | SD    | Mean                  | SD     | Mean                               | SD     |           |
| Age (years) <sup>a</sup>    | 36.01                              | 11.79 | 32.88                 | 11.73  | 35.29                              | 12.21  | < 0.049   |
| PANSS-positive              | -                                  | -     | 16.15                 | 5.35   | 14.14                              | 5.45   |           |
| PANSS-negative              | -                                  | -     | 16.7                  | 5.76   | 13.15                              | 4.85   |           |
| PANSS-general               | -                                  | -     | 32.37                 | 9.02   | 30.25                              | 9.04   |           |
| SBS                         | -                                  | -     | 7.68                  | 1.33   | 1.99                               | 1.77   |           |
| WRAT-4 <sup>b,c</sup>       | 103.87                             | 12.83 | 96.37                 | 15.84  | 101.21                             | 14.05  | < 0.0001  |
| CPZ equivalent <sup>d</sup> | -                                  | -     | 614.12                | 502.89 | 417.53                             | 389.42 |           |
|                             | N                                  | %     | N                     | %      | N                                  | %      |           |
| Sex <sup>e</sup>            |                                    |       |                       |        |                                    |        |           |
| Male                        | 39                                 | 41    | 104                   | 72     | 84                                 | 40     | < 2.23e-9 |
| Female                      | 56                                 | 59    | 40                    | 28     | 126                                | 60     |           |
| Site                        |                                    |       |                       |        |                                    |        |           |
| Baltimore                   | 14                                 | 14.7  | 34                    | 23.6   | 43                                 | 20.4   | < 0.11    |
| Boston <sup>f</sup>         | 0                                  | 0     | 3                     | 2      | 0                                  | 0      |           |
| Chicago                     | 26                                 | 27.4  | 31                    | 21.5   | 67                                 | 31.9   |           |
| Dallas <sup>f</sup>         | 7                                  | 7.3   | 16                    | 11.1   | 27                                 | 12.8   |           |
| Detroit                     | 17                                 | 17.9  | 15                    | 10.4   | 22                                 | 10.4   |           |
| Hartford                    | 31                                 | 32.6  | 45                    | 31.2   | 53                                 | 25.2   |           |
| Schizoaffective disorder    | 0                                  | 0     | 28                    | 19.4   | 57                                 | 27.1   |           |
| Race                        |                                    |       |                       |        |                                    |        |           |
| Caucasian                   | 54                                 | 56.8  | 77                    | 53.4   | 139                                | 66.1   |           |
| African-American            | 26                                 | 27.3  | 45                    | 31.2   | 41                                 | 19.5   |           |
| Hispanic                    | 6                                  | 6.3   | 2                     | 1      | 4                                  | 1.9    |           |
| Asian                       | 5                                  | 2.3   | 13                    | 9      | 17                                 | 8      |           |
| Mixed                       | 4                                  | 4.2   | 7                     | 4.8    | 9                                  | 4.2    |           |

<sup>a</sup>Healthy comparison group > Schizophrenia probands

<sup>b</sup>Healthy comparison group > Schizophrenia probands

<sup>c</sup>3 subjects including 1 healthy comparison and 2 schizophrenia patients did not have WRAT-4 score

<sup>d</sup>CPZ equivalent dosage data were available for 85 schizophrenia and 130 psychotic bipolar probands

<sup>e</sup>Disproportionate number of males in probands and disproportionate number of females in psychotic bipolar probands

<sup>f</sup>There were only 3 subjects from the Boston site and since identical EEG equipment was used to collect data at both Boston and Detroit sites managed by the same investigator (two sites were merged in the study). Site was used as a factor with 5 levels in the statistical analysis.

CPZ, chlorpromazine; PANSS, Positive and Negative Syndrome Scale SBS, Schizo-Bipolar Scale; SD, standard deviation; WRAT-4 wide range achievement test, 4<sup>th</sup> edition



**TABLE S2.** Medication Information for Probands

|                                                                         | Psychotic bipolar disorder (N=210) |       | Schizophrenia (N=144) |      | Healthy comparison subjects (N=95) |      |
|-------------------------------------------------------------------------|------------------------------------|-------|-----------------------|------|------------------------------------|------|
|                                                                         | N                                  | %     | N                     | %    | N                                  | %    |
| Unknown medication history                                              | 1                                  | 0.4   | 1                     | 0.7  | 1                                  | 1.1  |
| Medication data below are for subjects with medication history reported | 209                                | 99.6  | 143                   | 99.3 | 94                                 | 98.9 |
| No medication taken                                                     | 6                                  | 2.8   | 4                     | 2.8  | 40                                 | 42.6 |
| Not on psychotropic medications                                         | 9                                  | 4.3   | 8                     | 5.6  | 88                                 | 96.3 |
| On more than one psychotropic medications                               | 175                                | 83.7  | 108                   | 75.5 | 1                                  | 1    |
| Anticholinergic/Antiparkinsonian                                        | 24                                 | 11.4  | 24                    | 16.7 | 0                                  | 0    |
| Antidepressant (Any)                                                    | 106                                | 50.7  | 59                    | 41.2 | 1                                  | 1    |
| A. Tricyclic                                                            | 7                                  | 3.3   | 1                     | 0.7  | 0                                  | 0    |
| B. MAO inhibitors                                                       | 0                                  | 0     | 0                     | 0    | 0                                  | 0    |
| C. SSRI/SNRI                                                            | 51                                 | 24.4  | 42                    | 29.3 | 1                                  | 1    |
| D. Miscellaneous                                                        | 48                                 | 22.9  | 16                    | 11.1 | 0                                  | 0    |
| Antipsychotic (Any)                                                     | 165                                | 78.9  | 133                   | 93   | 0                                  | 0    |
| A. First generation                                                     | 21                                 | 10    | 13                    | 9    | 0                                  | 0    |
| B. Second generation                                                    | 144                                | 68.8  | 119                   | 83.2 | 0                                  | 0    |
| Anxiolytic/Hypnotic, Mood Stabilizer (Any)                              | 71                                 | 33.9  | 36                    | 25.1 | 0                                  | 0    |
| A. Lithium                                                              | 151                                | 72.2  | 39                    | 27.2 | 0                                  | 0    |
| B. Anticonvulsants                                                      | 44                                 | 21.05 | 12                    | 8.4  | 0                                  | 0    |
| Miscellaneous, Centrally Active                                         | 107                                | 51.1  | 27                    | 18.8 | 0                                  | 0    |
| Stimulants                                                              | 8                                  | 3.8   | 4                     | 2.8  | 0                                  | 0    |
|                                                                         | 17                                 | 8.1   | 6                     | 4.2  | 0                                  | 0    |

MAO, monoamine oxidase inhibitor; SNRI, serotonin-norepinephrine reuptake inhibitors; SSRI, selective serotonin reuptake inhibitors

**TABLE S3.** Results of enrichment analysis including GeneGo pathway maps, process networks, metabolic networks, and gene ontology processes associated with contributing genes from components G1, G4, and G9. Bold p values indicate significance ( $p < 0.05$ ) after false discovery rate (FDR) correction.

| <b>Pathways for G1</b>                                                                                    |                    |                 |                          |
|-----------------------------------------------------------------------------------------------------------|--------------------|-----------------|--------------------------|
| <b>Pathway maps</b>                                                                                       | p<br>(uncorrected) | p<br>(FDR)      | Ratio = In<br>data/Total |
| Development_slit-robo signaling                                                                           | 1.93E-3            | 0.29            | 3/30                     |
| Neurophysiological process_NMDA-dependent postsynaptic LTP in CA1 hippocampal neurons                     | 4.39E-3            | 0.29            | 4/80                     |
| Cell cycle_nucleocytoplasmic transport of CDK/cyclins                                                     | 5.86E-3            | 0.29            | 2/14                     |
| Neurophysiological process_ACM regulation of nerve impulse                                                | 6.56E-3            | 0.29            | 3/46                     |
| Neurophysiological process_dopamine D2 receptor signaling in CNS                                          | 6.96E-3            | 0.29            | 3/47                     |
| Mechanism of action of CCR4 antagonists in asthma and atopic dermatitis                                   | 8.35E-3            | 0.29            | 1/1                      |
| Development role of HDAC and calcium/calmodulin-dependent kinase (caMK) in control of skeletal myogenesis | 1.02E-2            | 0.29            | 3/54                     |
| wtCFTR and delta508 traffic/clathrin coated vesicles formation                                            | 1.07E-2            | 0.29            | 2/19                     |
| Muscle contract_ACM regulation of smooth muscle contraction                                               | 1.12E-2            | 0.29            | 3/56                     |
| Cytoskeleton remodeling_FAK signaling                                                                     | 1.18E-2            | 0.29            | 3/57                     |
| <b>Process networks</b>                                                                                   |                    |                 |                          |
| Development_neurogenesis_axonal guidance                                                                  | 3.85E-5            | <b>4.39E-3</b>  | 12/230                   |
| Cell adhesion_cadherins                                                                                   | 5.21E-4            | <b>2.37E-2</b>  | 9/180                    |
| Cell adhesion_synaptic contact                                                                            | 6.12E-4            | <b>2.32E-2</b>  | 9/184                    |
| Reproduction_feeding and neurohormone signaling                                                           | 1.61E-3            | <b>4.6E-2</b>   | 9/211                    |
| Development_neurogenesis_synaptogenesis                                                                   | 2.28E-3            | <b>5.E-2</b>    | 8/180                    |
| Neurophysiological process_LTP                                                                            | 4.16E-3            | 7.9E-2          | 5/82                     |
| Cell adhesion_attractive and repulsive receptors                                                          | 7.58E-3            | 1.23E-1         | 7/175                    |
| Calcium transport                                                                                         | 1.22E-2            | 1.75E-1         | 7/192                    |
| Neurophysiological process_transmission of nerve impulse                                                  | 2.01E-2            | 2.55E-1         | 7/212                    |
| Cell adhesion_amyloid proteins                                                                            | 4.12E-2            | 4.69E-1         | 6/195                    |
| <b>Metabolic networks</b>                                                                                 |                    |                 |                          |
| Lysophosphatidylserine pathway                                                                            | 7.46E-6            | <b>4.77E-4</b>  | 6/82                     |
| Sphingomyelin pathway                                                                                     | 3.14E-4            | <b>1.0E-2</b>   | 5/102                    |
| Lipid metabolism_phosphatidylinositol metabolism                                                          | 1.54E-3            | <b>3.29E-2</b>  | 4/85                     |
| Glutamic acid pathway                                                                                     | 3.23E-3            | 5.18E-2         | 4/104                    |
| L-ornithine pathways and transport                                                                        | 7.16E-3            | 7.84E-2         | 4/130                    |
| L-glutamate pathways and transport                                                                        | 7.35E-3            | 7.84E-2         | 4/131                    |
| Glutamic acid pathways and transport                                                                      | 1.04E-2            | 9.56E-2         | 4/145                    |
| O-hexanoyl-(L)-carnitine pathway                                                                          | 1.52E-2            | 9.76E-2         | 3/88                     |
| 1,2-didocosapentaenoyl-sn-glycerol_3-phosphate_pathway                                                    | 1.71E-2            | 9.76E-2         | 3/92                     |
| Myristoyl-L-carnitine pathway                                                                             | 1.76E-2            | 9.76E-2         | 3/93                     |
| <b>Go processes</b>                                                                                       |                    |                 |                          |
| Nervous system development                                                                                | 4.23E-15           | <b>1.70E-11</b> | 72/2469                  |
| Cell differentiation                                                                                      | 1.42E-12           | <b>2.86E-9</b>  | 83/3483                  |
| System development                                                                                        | 3.05e-12           | <b>4.08E-9</b>  | 100/4718                 |
| Cellular developmental process                                                                            | 9.55e-12           | <b>9.59E-9</b>  | 83/3609                  |
| Neurogenesis                                                                                              | 1.47e-11           | <b>1.18E-8</b>  | 52/1708                  |
| Anatomical structure development                                                                          | 1.85e-11           | <b>1.24E-8</b>  | 106/5304                 |
| Learning                                                                                                  | 3.48e-11           | <b>1.99E-8</b>  | 16/162                   |
| Regulation of synapse structure and activity                                                              | 4.03e-11           | <b>2.02E-8</b>  | 13/95                    |
| Multicellular organismal development                                                                      | 8.15e-11           | <b>3.63E-8</b>  | 106/5430                 |
| Single-organism developmental process                                                                     | 9.41e-11           | <b>3.78E-8</b>  | 95/4624                  |

*Continued*

| <b>Pathways for G4</b>                                                                   |          |                |         |
|------------------------------------------------------------------------------------------|----------|----------------|---------|
| <b>Pathway maps</b>                                                                      |          |                |         |
| ATP metabolism                                                                           | 4.01E-4  | 1.14E-1        | 6/106   |
| Signal transduction_cAMP signaling                                                       | 4.94E-3  | 2.53E-1        | 3/38    |
| Development_gastrin in differentiation of gastric mucosa                                 | 4.94E-3  | 2.53E-1        | 3/38    |
| Signal transduction_PKB signaling                                                        | 7.0E-3   | 2.53E-1        | 3/43    |
| Cell cycle_nucleocytoplasmic transport of CDK/cyclins                                    | 7.01E-3  | 2.53E-1        | 2/14    |
| Development_VEGF signaling via VEGFR2-generic cascades                                   | 7.21E-3  | 2.53E-1        | 4/84    |
| Regulation of lipid metabolism_regulation of lipid metabolism by niacin and isoprenaline | 7.95E-3  | 2.53E-1        | 3/45    |
| G-protein signaling_regulation of cAMP levels by ACM                                     | 7.95E-3  | 2.53E-1        | 3/45    |
| Immune response_MIF_the neuroendocrine-macrophage connector                              | 8.44E-3  | 2.53E-1        | 3/46    |
| Cell adhesion_integrin-mediated cell adhesion and migration                              | 9.5E-3   | 2.53E-1        | 3/48    |
| <b>Process networks</b>                                                                  |          |                |         |
| Cell adhesion_synaptic contact                                                           | 7.43E-5  | <b>8.99E-3</b> | 11/184  |
| Development_neurogenesis_synaptogenesis                                                  | 1.25E-3  | <b>5.0E-2</b>  | 9/180   |
| Cell adhesion_cadherins                                                                  | 1.25E-3  | <b>5.0E-2</b>  | 9/180   |
| Development_skeletal muscle development                                                  | 5.13E-3  | 1.45E-1        | 7/144   |
| Cell adhesion_amyloid proteins                                                           | 7.67E-3  | 1.45E-1        | 8/195   |
| Proteolysis_connective tissue degradation                                                | 7.94E-3  | 1.45E-1        | 6/119   |
| Cell adhesion_platelet aggregation                                                       | 8.43E-3  | 1.45E-1        | 7/158   |
| Development_neurogenesis_axonal guidance                                                 | 1.95E-2  | 2.53E-1        | 8/230   |
| Development neuromuscular junction                                                       | 2.08E-2  | 2.53E-1        | 6/147   |
| Apoptosis_anti-apoptosis mediated by external signals via PI3K/AKT                       | 2.09E-2  | 2.53E-1        | 8/233   |
| <b>Metabolic networks</b>                                                                |          |                |         |
| N-acyl-sphingosine phosphate pathways                                                    | 1.48E-6  | <b>1.70E-4</b> | 7/99    |
| Lysophosphatidylserine pathways                                                          | 7.46E-6  | <b>4.29E-4</b> | 6/82    |
| Phosphatidic acid pathways                                                               | 8.5E-5   | <b>3.26E-3</b> | 3/15    |
| Ceramide pathway                                                                         | 1.06E-3  | <b>3.07E-2</b> | 4/77    |
| 1,2-didocosapentaenoyl-sn-glycerol_3-phosphate pathway                                   | 2.07E-3  | <b>4.61E-2</b> | 4/92    |
| 1,2-dioleoyl-sn-glycerol_3-phosphate pathway                                             | 2.42E-3  | <b>4.62E-2</b> | 4/96    |
| 1,2-didocosahexaenoyl-sn-glycerol_3-phosphate pathway                                    | 2.8E-3   | <b>4.62E-2</b> | 4/100   |
| Phosphatidylinositol-4,5-diphosphate pathway                                             | 1.86E-2  | 2.68E-1        | 3/95    |
| Sphingomyelin pathway                                                                    | 2.25E-2  | 2.87E-1        | 3/102   |
| Aminoacid metabolism_asparagine, aspartic acid, arginine metabolism                      | 7.52E-2  | 4.14E-1        | 2/76    |
| <b>GO processes</b>                                                                      |          |                |         |
| Cell adhesion                                                                            | 6.95E-11 | <b>1.39E-7</b> | 39/972  |
| Biological adhesion                                                                      | 8.58E-11 | <b>1.39E-7</b> | 39/979  |
| Neuron development                                                                       | 2.99E-10 | <b>3.23E-7</b> | 39/1022 |
| Neuron differentiation                                                                   | 4.11E-10 | <b>3.33E-7</b> | 43/1222 |
| Regulation of synapse assembly                                                           | 7.86E-10 | <b>5.09E-7</b> | 10/53   |
| Regulation of synapse structure and activity                                             | 1.97E-10 | <b>1.06E-6</b> | 12/95   |
| Positive regulation of nervous system development                                        | 4.84E-9  | <b>1.76E-6</b> | 8/33    |
| Positive regulation of synapse assembly                                                  | 4.84E-9  | <b>1.76E-6</b> | 8/33    |
| Regulation of synapse organization                                                       | 4.91E-9  | <b>1.76E-6</b> | 11/82   |
| Negative regulation of filopodium assembly                                               | 5.45E-9  | <b>1.76E-6</b> | 5/7     |

*Continued*

| <b>Pathways for G9</b>                                   |                    |                 |                          |
|----------------------------------------------------------|--------------------|-----------------|--------------------------|
| <b>Pathway maps</b>                                      | p<br>(uncorrected) | p<br>(FDR)      | Ratio = In<br>data/Total |
| Immune response_alternative complement pathway           | 3.18E-8            | <b>8.3E-6</b>   | 7/39                     |
| Immune response_lectin induced complement pathway        | 1.65E-7            | <b>2.16E-5</b>  | 7/49                     |
| Immune response_classical complement pathway             | 2.53E-5            | <b>2.2E-5</b>   | 7/52                     |
| G-protein signaling_RhoA regulation pathway              | 1.91E-4            | <b>1.24E-2</b>  | 4/34                     |
| Development_slit-robo signaling                          | 2.09E-3            | 1.09E-1         | 3/30                     |
| G-protein signaling_G-protein alpha-12 signaling pathway | 3.83E-3            | 1.66E-1         | 3/37                     |
| Development_thrombopoietin-regulated cell processes      | 6.66E-3            | 1.91E-1         | 3/45                     |
| Beta-2-adrenergic-dependent CFTR expression              | 7.10E-3            | 1.91E-1         | 2/15                     |
| Development_PIP3 signaling in cardiac myocytes           | 7.52E-3            | 1.91E-1         | 3/47                     |
| Development_TGF-beta-dependent induction of EMT via MAPK | 7.52E-3            | 1.91E-1         | 3/47                     |
| <b>Process networks</b>                                  |                    |                 |                          |
| Cell adhesion_synaptic contact                           | 7.77E-6            | <b>9.72E-4</b>  | 13/184                   |
| Cell adhesion_cadherins                                  | 6.5E-4             | <b>4.06E-2</b>  | 10/180                   |
| Inflammation_complement system                           | 1.13E-3            | <b>4.71E-2</b>  | 6/73                     |
| Cell adhesion_attractive and repulsive receptors         | 2.08E-3            | 6.3E-2          | 9/175                    |
| Development_neurogenesis synaptogenesis                  | 2.52E-3            | 6.3E-2          | 9/180                    |
| Signal transduction_cholecystokinin signaling            | 7.35E-3            | 1.37E-1         | 6/106                    |
| Cytoskeleton actin filaments                             | 7.67E-3            | 1.37E-1         | 8/176                    |
| Apoptosis_apoptosis stimulation by external signals      | 9.08E-3            | 1.42E-1         | 7/145                    |
| Cytoskeleton_cytoplasmic microtubules                    | 1.08E-2            | 1.49E-1         | 6/115                    |
| Signal transduction_Wnt signaling                        | 2.47E-2            | 3.02E-1         | 7/177                    |
| <b>Metabolic networks</b>                                |                    |                 |                          |
| O-hexadecaoyl-(L)-carnitine pathway                      | 1.93E-5            | <b>2.47E-3</b>  | 5/74                     |
| Lysophosphatidylserine pathway                           | 6.24E-3            | 2.83E-1         | 3/82                     |
| Phosphatidylinositol-4,5-diphosphate pathway             | 9.37E-3            | 2.83E-1         | 3/95                     |
| CYP2C9-2-insulin-C/EBP-IRS1                              | 1.07E-2            | 2.83E-1         | 3/100                    |
| CYP2C9-1-insulin-C/EBP-IRS1                              | 1.10E-2            | 2.83E-1         | 3/101                    |
| 1-linoleoyl-glycerol_3-phosphate pathway                 | 6.12E-2            | 3.75E-1         | 2/87                     |
| CYP2D6-5-Glucagon-HNF4                                   | 6.12E-2            | 3.75E-1         | 2/87                     |
| CYP2C9-3-Glucagon-HNF4alpha                              | 6.62E-2            | 3.75E-1         | 2/91                     |
| CYP2C9-2-Glucagon-HNF4alpha                              | 6.75E-2            | 3.75E-1         | 2/92                     |
| Acyl-L-carnitine pathway                                 | 6.75E-2            | 3.75E-1         | 2/92                     |
| <b>GO processes</b>                                      |                    |                 |                          |
| Nervous system development                               | 2.78E-15           | <b>9.85E-12</b> | 76/2469                  |
| Cell projection organization                             | 2.31E-14           | <b>4.09E-11</b> | 47/1105                  |
| Cell differentiation                                     | 4.25E-14           | <b>5.02E-11</b> | 91/3483                  |
| Cell development                                         | 5.84E-14           | <b>5.18E-11</b> | 61/1805                  |
| Cellular developmental process                           | 1.26E-13           | <b>8.96E-11</b> | 92/3609                  |
| System development                                       | 1.52E-13           | <b>9.02E-11</b> | 109/4718                 |
| Neurogenesis                                             | 2.30E-13           | <b>1.16E-10</b> | 58/1708                  |
| Multicellular organismal signaling                       | 3.04E-13           | <b>1.34E-10</b> | 42/964                   |
| Neuron development                                       | 4.95E-13           | <b>1.94E-10</b> | 43/1022                  |
| Multicellular organismal development                     | 5.88E-13           | <b>1.94E-10</b> | 118/5430                 |

ACM, astrocyte conditioned medium; ATP, adenosine triphosphate; CA1, cornu Ammonis1; cAMP, cyclic adenosine monophosphate; CCR4, CC-chemokine receptor 4; CDK, cyclin-dependent kinase; CFTR, cystic fibrosis transmembrane conductance regulator; CNS, central nervous system; EBP, enhancer binding protein; EMT, epithelial-mesenchymal transition; FAK, focal adhesion kinase; HNF, hepatic nuclear factor; IRS1, insulin receptor substrate 1; LTP, long term potentiation; MAPK, mitogen-activated protein kinase; MIF, migration inhibitor factor;

NMDA, N-methyl-D-Aspartate; PI3K, phosphoinositide 3-kinase; PIP3, phosphatidylinositol (3,4,5)-triphosphate; PKB, protein kinase B; TGF, transforming growth factor; VEGF, vascular endothelial growth factor, VEGFR, vascular endothelial growth factor receptor,

**TABLE S4.** Pathways, disease risk, and brain regions associated with top 20 genes from gene components G1, G4, and G9. Expression Z-scores from Allen brain atlas database was used to identify brain regions. Other mental disorders associated with these genes from prior studies are also provided (references in online supplementary text). Gene information was obtained from Dbsnp and Genecard.

| Gene network G1 |                             |                                            |                                                                                                     |                      |
|-----------------|-----------------------------|--------------------------------------------|-----------------------------------------------------------------------------------------------------|----------------------|
| Gene            | SNP                         | Disease risk                               | Pathway involved                                                                                    | Allen atlas location |
| DCC             | rs16956411 <sup>1</sup>     | SZ (19)                                    |                                                                                                     | HP, NA & SN          |
| BOC             | rs775228 <sup>1</sup>       |                                            | Hedgehog signaling                                                                                  | CC, HP & AM          |
| SEC14L2         | rs4820845 <sup>1</sup>      |                                            |                                                                                                     | SRG, SN & GP         |
| PDLIM5          | rs13121500 <sup>1</sup>     | SZ (20), PBP (21, 22) & MDD (23)           |                                                                                                     | HT, PT & SN          |
| HDAC9           | rs12699994 <sup>1</sup>     | SZ (24)                                    | Immune response, histone modification & valproic acid                                               | SRG, HT & TH         |
| MAML3           | rs7678266 <sup>1</sup>      |                                            | NOTCH signaling                                                                                     | CC, IRG & HT         |
| B3GNTL1         | rs1001865 <sup>1</sup>      |                                            | Post-translational protein modification                                                             | TH, IRG & TP         |
| TBCD            | rs3785520 <sup>1</sup>      |                                            | Protein folding                                                                                     | HP, SRG & ST         |
| SNAP91          | rs1546977 <sup>1</sup>      | MIPBP (25)                                 | Transport clathrin-coated vesicle cycle                                                             | HP, CC & TH          |
| LY9             | rs574610 <sup>Utr-3</sup>   |                                            |                                                                                                     | HT, TH & CC          |
| CD244           | rs485618 <sup>Utr-3</sup>   |                                            | Hemostasis                                                                                          | MOG, TL & IN         |
| CDKAL1          | rs7758129 <sup>1</sup>      |                                            |                                                                                                     | CC, HT & SN          |
| ESRRG           | rs3929399 <sup>1</sup>      |                                            | Generic & nuclear transcription                                                                     | CN, CC & CU          |
| MCTP2           | rs1655455 <sup>1</sup>      | SZ (26), PBP (27), MDD (28) & ASD (29, 30) |                                                                                                     | IFG, HT & ST         |
| PIP4K2A         | rs7071450 <sup>1</sup>      | SZ (31)                                    | Ca <sup>2+</sup> , cAMP & lipid signaling, regulates actin cytoskeleton and phospholipid metabolism | TH, POG & CN         |
| TMEFF2          | rs10185068 <sup>1</sup>     |                                            |                                                                                                     | AM, TH & SG          |
| ZC3H18          | rs12445653 <sup>1</sup>     |                                            |                                                                                                     | CC, ST & GP          |
| VWA3B           | rs10211067 <sup>Utr-5</sup> |                                            |                                                                                                     | HT, AM & ST          |
| RASGRP3         | rs1168777 <sup>1</sup>      |                                            | G-protein H-RAS regulation, MAPK; B cell receptor signaling                                         | CN, GP & TH          |
| ANKIB1          | rs721015 <sup>1</sup>       |                                            |                                                                                                     | CN, TH & SN          |
| Gene network G4 |                             |                                            |                                                                                                     |                      |
| Gene            | SNP                         | Disease risk                               | Pathway involved                                                                                    | Allen atlas location |
| MSRA            | rs7459532 <sup>1</sup>      | SZ (32, 33), PBP (34) & AD (35)            |                                                                                                     | CC, HP & TH          |
| XKR6            | rs2409691 <sup>1</sup>      |                                            |                                                                                                     | CC, AM & HP          |
| RPIL1           | rs7386213 <sup>1</sup>      |                                            |                                                                                                     | CC, TH & HT          |
| BLK             | rs2618451 <sup>1</sup>      |                                            | Tyrosine kinases, Immune system, lymphocyte & B cell receptor signaling                             | CC, FO & HP          |
| TNKS            | rs7840706 <sup>1</sup>      |                                            | NAD metabolism                                                                                      | CC, VT & CN          |
| TPO             | rs2276702 <sup>1</sup>      |                                            | Metabolic, thyroxine biosynthesis                                                                   | CC, HT & ITG         |
| IL1F10          | rs6761276 <sup>M</sup>      |                                            |                                                                                                     | HT, SN & AM          |
| MFHAS1          | rs4841044 <sup>1</sup>      |                                            |                                                                                                     | CC, VT & OL          |
| ADAMTS16        | rs270178 <sup>1</sup>       |                                            |                                                                                                     | CC, SG & HP          |
| DOCK8           | rs10967788 <sup>1</sup>     | ASD (36) & MR (37)                         | Hemostasis                                                                                          | CN, GP & SN          |
| TAF8            | rs6917299 <sup>1</sup>      |                                            | Ligand-dependent transcription of retinoid target genes, Basal transcription factors                | SRG, VT & AM         |

*Continued*

| GSG1L                   | rs1645362 <sup>1</sup>  |                                                                  |                                                                             | TH, SN & ST          |
|-------------------------|-------------------------|------------------------------------------------------------------|-----------------------------------------------------------------------------|----------------------|
| ODZ3                    | rs957053 <sup>1</sup>   |                                                                  |                                                                             | TH, AM & HP          |
| VAT1L                   | rs9933953 <sup>1</sup>  |                                                                  |                                                                             | AM, HT & LC          |
| USH2A                   | rs17025267 <sup>1</sup> |                                                                  |                                                                             | TH, AM & VT          |
| COL2A1 <sup>‡</sup>     | rs1793923 <sup>1</sup>  |                                                                  | CA intergin-inside-out signaling, focal adhesion & ECM receptor interaction | CC, HT & LC          |
| INPP5K                  | rs1109303 <sup>1</sup>  |                                                                  | Metabolic, phosphatidylinositol signaling system                            | TH, SN & HT          |
| NRXN3                   | rs10782463 <sup>1</sup> | SZ (38), ASD (39) & ALD (40)                                     | Brain CAM, GABA signaling                                                   | CC, IFG & AM         |
| PNPLA1                  | rs12197079 <sup>M</sup> |                                                                  |                                                                             | SN, AM & CC          |
| PKP3                    | rs7105848 <sup>1</sup>  |                                                                  |                                                                             | MOG, HT & ITG        |
| Gene network G9         |                         |                                                                  |                                                                             |                      |
| Gene                    | SNP                     | Disease risk                                                     | Pathway involved                                                            | Allen atlas location |
| ME1                     | rs1170348 <sup>1</sup>  |                                                                  |                                                                             | HT, VT & LC          |
| PEMT                    | rs11078389 <sup>1</sup> | SZ (41) & AD (42)                                                | Metabolic, acetylcholine synthesis                                          | CC, IFG & HT         |
| GPC6                    | rs4369513 <sup>1</sup>  |                                                                  | WNT signaling, metabolism                                                   | HT, VT & LC          |
| SNAP91                  | rs217291 <sup>1</sup>   |                                                                  |                                                                             | CC, HP & TH          |
| DLGAP1                  | rs1465947 <sup>1</sup>  | SZ (43) & OCD (44)                                               | Glutamatergic synapse                                                       | HP, SOG & IFG        |
| PRSS35                  | rs592911 <sup>1</sup>   | MIPBP (25)                                                       |                                                                             | AM, SG & NA          |
| PCSK5                   | rs2842467 <sup>1</sup>  |                                                                  | Signal transduction & NGF signaling                                         | HT, GP & HP          |
| FRK                     | rs12662901 <sup>1</sup> | SZ,-AL (45) & AD (46)                                            |                                                                             | GP, SN & AM          |
| KCTD8                   | rs2020159 <sup>1</sup>  |                                                                  |                                                                             | CC, TH & AM          |
| PDLIM1                  | rs11593722 <sup>1</sup> | ADHD (47) & AD (48, 49)                                          |                                                                             | CC, SFG & TP         |
| CYP2C19                 | rs10786172 <sup>1</sup> | D (50) & P (51)                                                  | Estrogen biosynthesis, estrone metabolism & arachidonic acid                | CG, TH & PG          |
| ANO2                    | rs1035066 <sup>1</sup>  |                                                                  | Ion channel transport                                                       | HT, ST & AM          |
| SRRM4                   | rs1405050 <sup>1</sup>  |                                                                  |                                                                             | CC, SRG & IOG        |
| YSK4                    | rs4953941 <sup>1</sup>  |                                                                  |                                                                             | AM, HT & ST          |
| CNTNAP2 <sup>§, ¶</sup> | rs700281 <sup>1</sup>   | SZ (52, 53), MDD (53), P(54), PBP (52), ASD (55, 56) & ADHD (57) | CAM                                                                         | MOG, TH & LC         |
| PRDM16                  | rs1798246 <sup>1</sup>  |                                                                  |                                                                             | TH, SRG & ST         |
| TNNI1                   | rs3767548 <sup>1</sup>  |                                                                  | Striated muscle contraction                                                 | AM, TH & VT          |
| GLT1D1                  | rs516034 <sup>1</sup>   |                                                                  |                                                                             | SRG, HT & STG        |
| ESRRG                   | rs1833036 <sup>1</sup>  |                                                                  |                                                                             | CN, CU & TH          |
| ZNF385B                 | rs10432487 <sup>1</sup> |                                                                  |                                                                             | TH, CU & ST          |

<sup>‡</sup>Present in the top 100 genes in European-American (Accession: pha002858.1) genome wide study of bipolar disorder (58) from database of Genotypes and phenotypes (dbGap)

<sup>§</sup>Present in the top 100 genes in African-American (Accession: pha002863.1) genome wide study of bipolar disorder (58) from dbGap

<sup>¶</sup>Present in the top 100 genes in European-American (Accession: pha002857.1) genome wide study of schizophrenia (58) from dbGap

AD, Alzheimer's disease; ADHD, attention deficit-hyperactivity disorder; AL, alcoholism; AM, amygdala; ASD, autism spectrum disorder; CA, cell adhesion; Ca<sup>2+</sup>, calcium ion; CAM, cell adhesion molecule; cAMP, cyclic adenosine monophosphate; CC, cerebellar cortex; CP, cell proliferation; CPD, cell proliferation and differentiation; CN, cerebellar nuclei; CNS; central

nervous system; CU, cuneus; D, depression; ECM, extracellular matrix; FO, frontal operculum; GP, globus pallidus; HC, histocompatibility complex; HP, hippocampal formation; HT, hypothalamus; I, intron; IFG, inferior frontal gyrus; IN, insula; IOG, inferior occipital gyrus; ITG, inferior temporal gyrus; IRG, inferior rostral gyrus; LC, locus coeruleus; M, missense; MAPK, mitogen-activated protein kinase; MDD, major depressive disorder; MIPBP, mood incongruent; MOG, medial orbital gyrus; MR, mental retardation; NA, nucleus accumbens; NAD, nicotinamide adenine dinucleotide; NGF, nerve growth factor; OCD, obsessive-compulsive disorder; P, personality traits; PBP, psychotic bipolar disorder; PD, parkinson disease; PG, parolfactory gyri, POG, posterior orbital gyrus; PT, pontine tegmentum; SFG, superior frontal gyrus; SG, subcallosal gyrus; SMG, ; SN, substantia nigra; SNP, single nucleotide polymorphism; SOG, superior occipital gyrus; STG, superior temporal gyrus; SRG, superior rostral gyrus; ST, striatum; SZ, schizophrenia; TH, thalamus; TP, temporal pole; Utr-3, three prime untranslated region; Utr-5 five prime untranslated region; VT, ventral tegmental area;



**FIGURE S1.** Schematic of the 64-Channel EEG Montage Used for Data Collection

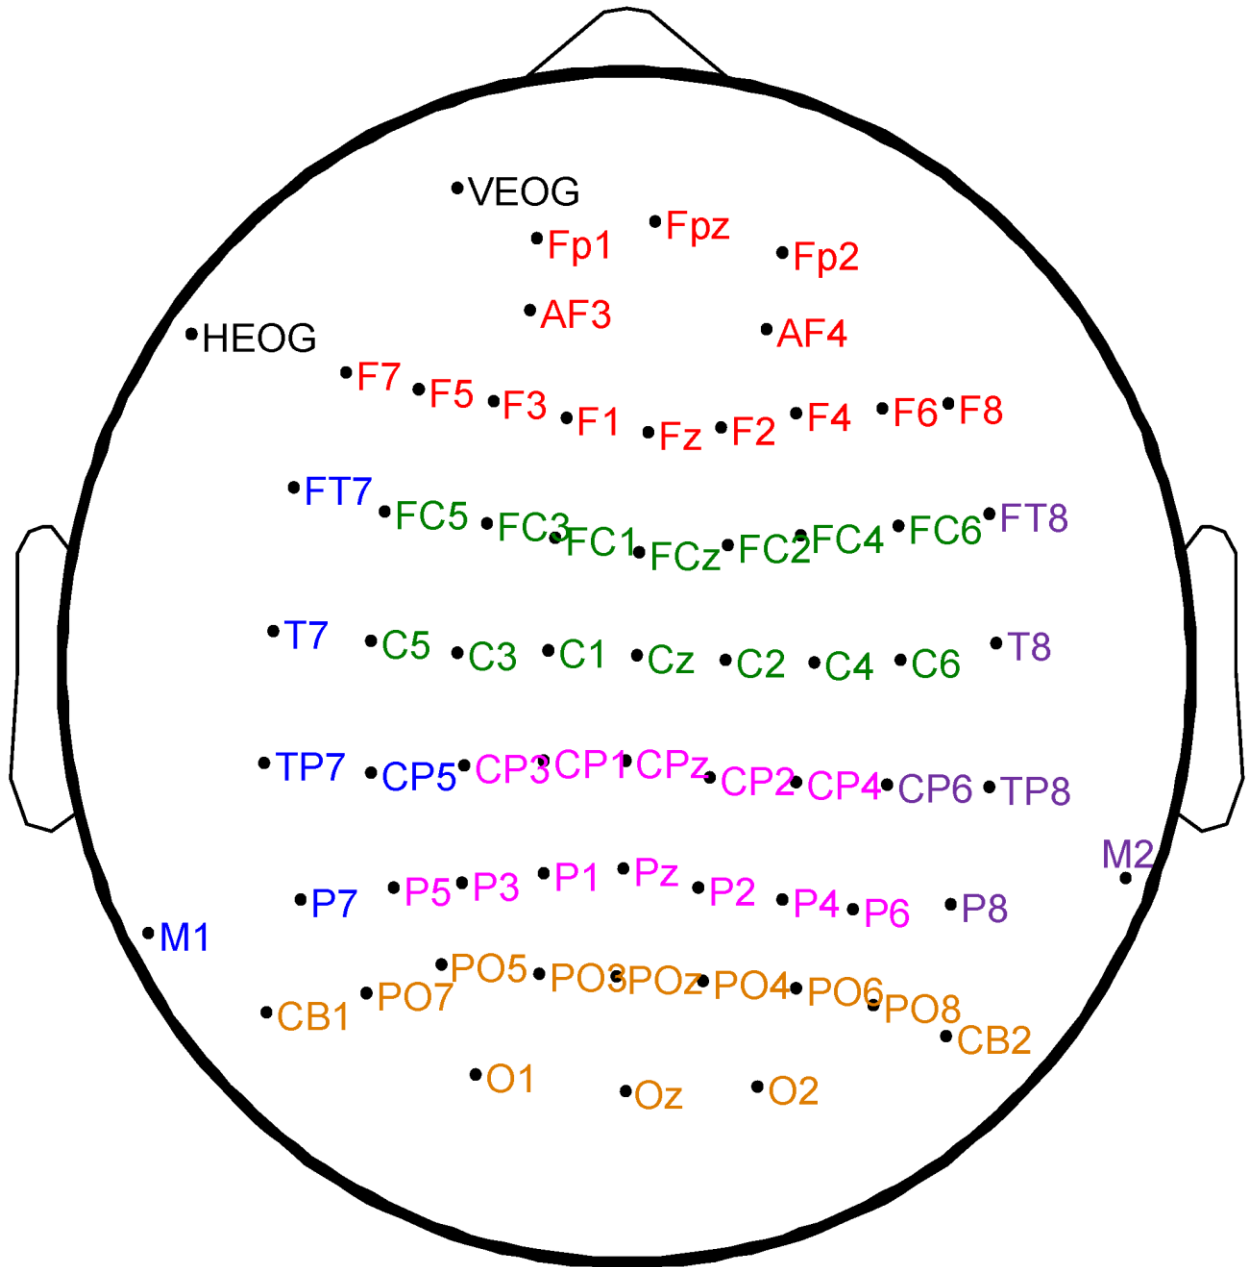

**FIGURE S2.** Schematic Depiction of the Processing Pipeline for Quality Control of Single-Nucleotide Polymorphism (SNP) Data<sup>a</sup>

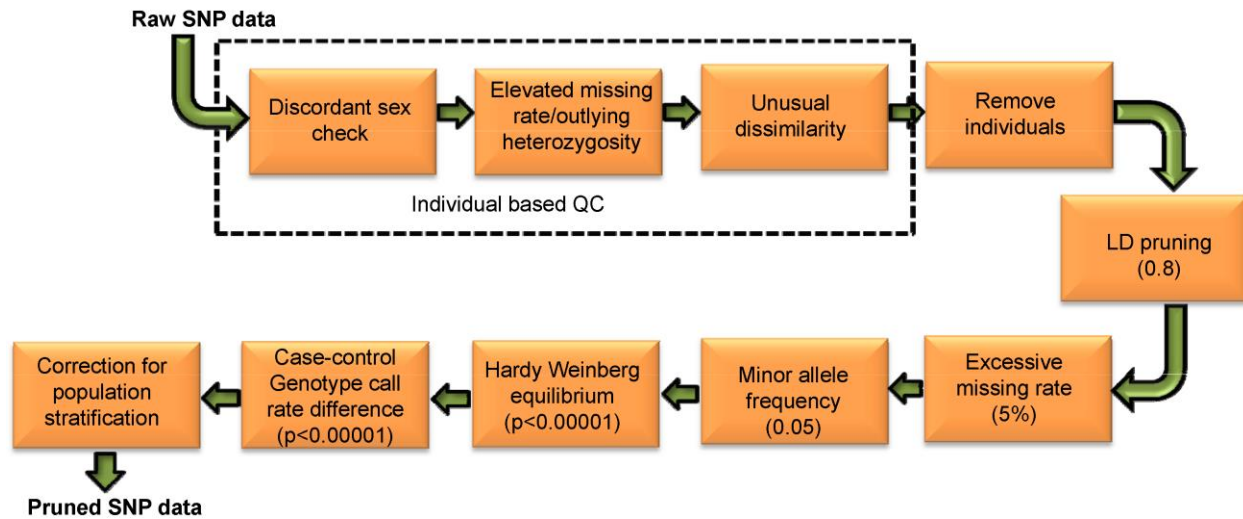

<sup>a</sup> The process involved two stages: individual based followed by SNP-based quality control. Poorly genotyped individuals and bad SNPs were removed from the final regression analysis. SNP data were corrected for stratification bias by correcting for the top three eigen factors associated with self-reported ethnicity. LD=linkage disequilibrium.

\* $p < 0.05$ . \*\* $p < 0.0001$ . \*\*\* $p < < 0.000000001$ .

**FIGURE S3.** Quantile-Quantile Plot of Theoretical and Empirical p Values From Logistic Regression for Schizophrenia Probands (SZ) vs Healthy Comparison Subjects (HC), and for Psychotic Bipolar Disorder Probands (PBP) vs. HC<sup>a</sup>

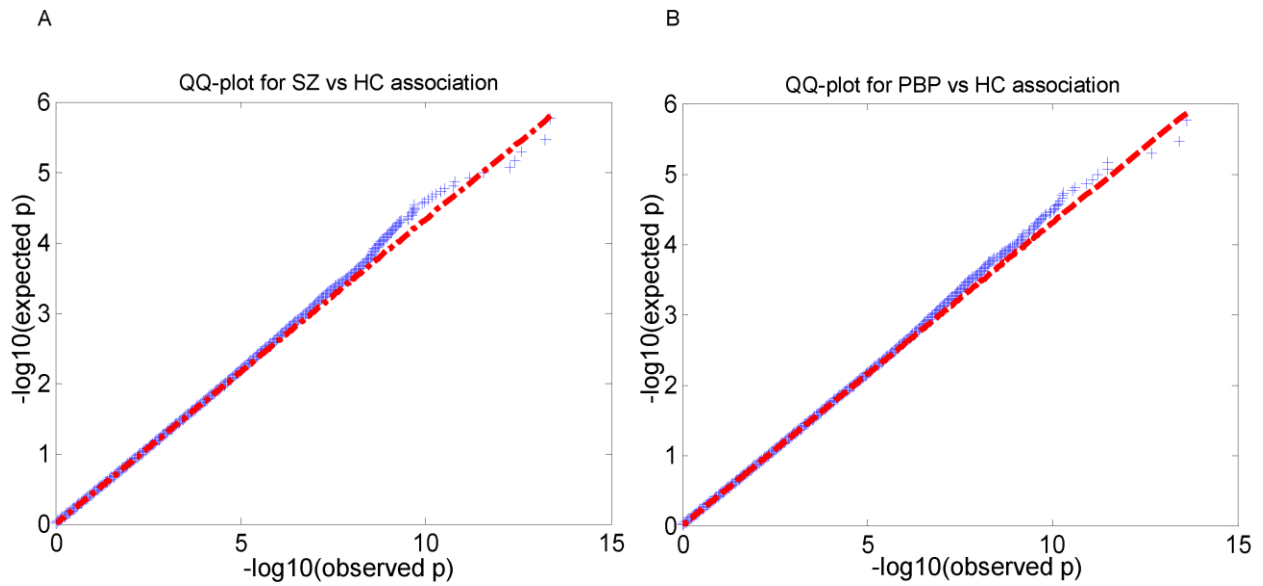

<sup>a</sup> Logistic regression was applied to individual markers in case-control fashion for both the SZ and PBP groups.

**FIGURE S4.** Schematic Illustration of the Parallel Independent Component Analysis (Para-ICA) for Genetic Association of Event-Related Potential (ERP) Data<sup>a</sup>

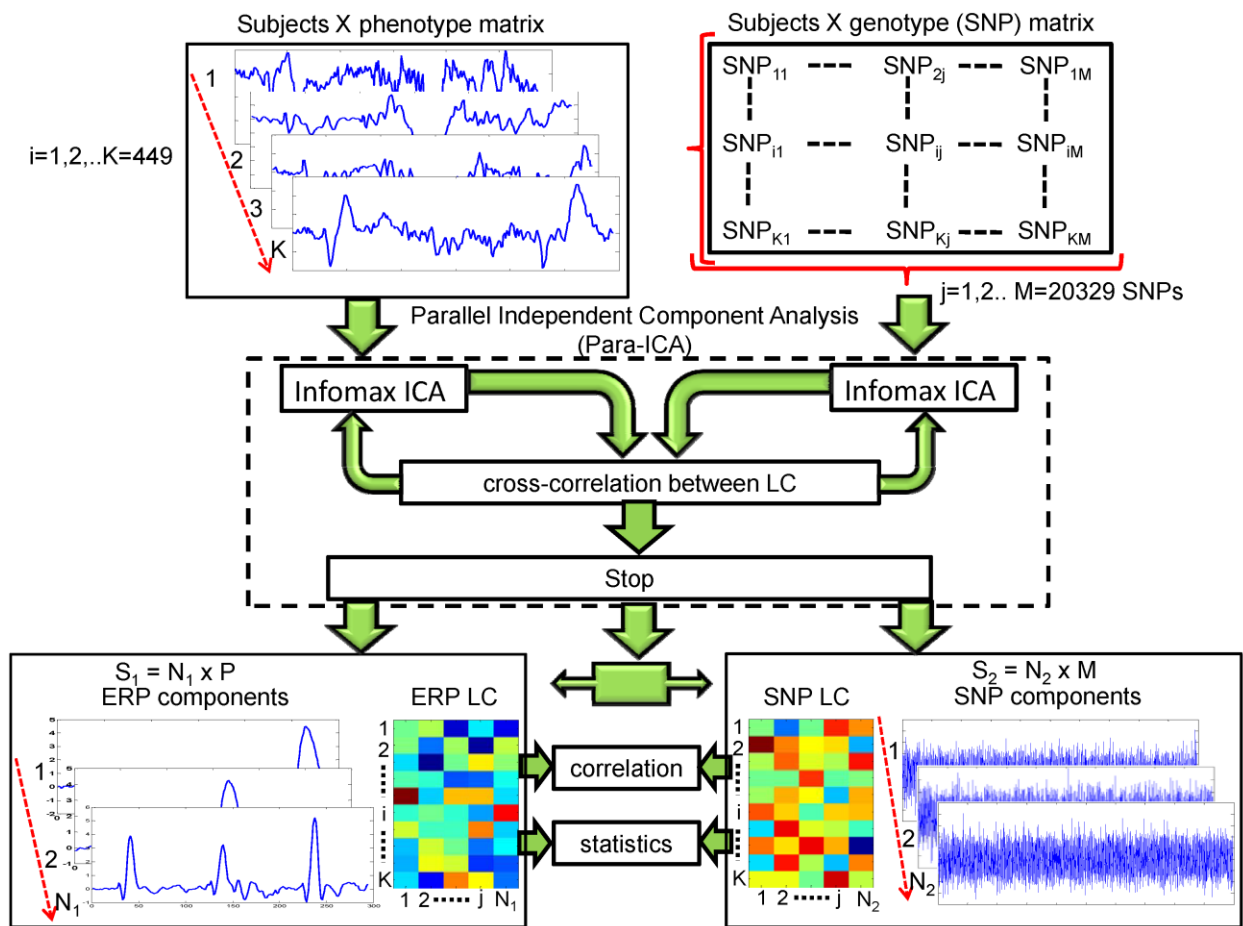

<sup>a</sup> Data were constructed as a matrix of subjects by SNP ( $K=449 \times M=20,329$ ) and subjects by reduced ERP waveforms ( $K=449 \times p=294$  [ $3 \times 98$  time points]). The number of components extracted from Para-ICA for the ERP and SNP data were  $N_1=8$  and  $N_2=11$ , respectively. LC=loading coefficient; SNP=single-nucleotide polymorphism.

## Supplementary References

1. First MB, Spitzer RL, Gibbs P, Williams NM: Structured Clinical Interview for DSM-IV Axis I Disorders (SCID) Version 2.0. New York, Biometrics Research Department, New York State Psychiatric Institute; 1998.
2. Strasser HC, Lilyestrom J, Ashby ER, Honeycutt NA, Schretlen DJ, Pulver AE, Hopkins RO, Depaulo JR, Potash JB, Schweizer B, Yates KO, Kurian E, Barta PE, Pearlson GD. Hippocampal and ventricular volumes in psychotic and nonpsychotic bipolar patients compared with schizophrenia patients and community control subjects: a pilot study. *Biol Psychiatry* 2005; 57:633-639.
3. Kay SR, Fiszbein A, Opler LA. The positive and negative syndrome scale (PANSS) for schizophrenia. *Schizophr Bull* 1987; 13:261-276.
4. Young RC, Biggs JT, Ziegler VE, Meyer DA. A rating scale for mania: reliability, validity and sensitivity. *Br J Psychiatry* 1978; 133:429-435.
5. Montgomery SA, Asberg M. A new depression scale designed to be sensitive to change. *Br J Psychiatry* 1979; 134:382-389.
6. Arnold SJ, Ivleva EI, Gopal TA, Reddy AP, Jeon-Slaughter H, Sacco CB, Francis AN, Tandon N, Bidesi AS, Witte B, Poudyal G, Pearlson GD, Sweeney JA, Clementz BA, Keshavan MS, Tamminga CA. Hippocampal Volume Is Reduced in Schizophrenia and Schizoaffective Disorder But Not in Psychotic Bipolar I Disorder Demonstrated by Both Manual Tracing and Automated Parcellation (FreeSurfer). *Schizophr Bull* 2014.
7. Dale AM, Fischl B, Sereno MI. Cortical surface-based analysis. I. Segmentation and surface reconstruction. *Neuroimage* 1999; 9:179-194.
8. Delorme A, Makeig S. EEGLAB: an open source toolbox for analysis of single-trial EEG dynamics including independent component analysis. *J Neurosci Methods* 2004; 134:9-21.
9. Ethridge LE, Hamm JP, Shapiro JR, Summerfelt AT, Keedy SK, Stevens MC, Pearlson G, Tamminga CA, Boutros NN, Sweeney JA, Keshavan MS, Thaker G, Clementz BA. Neural activations during auditory oddball processing discriminating schizophrenia and psychotic bipolar disorder. *Biol Psychiatry* 2012; 72:766-774.
10. Clementz BA, Blumenfeld LD. Multichannel electroencephalographic assessment of auditory evoked response suppression in schizophrenia. *Exp Brain Res* 2001; 139:377-390.
11. Dien J, Khoe W, Mangun GR. Evaluation of PCA and ICA of simulated ERPs: Promax vs. Infomax rotations. *Hum Brain Mapp* 2007; 28:742-763.
12. Anderson CA, Pettersson FH, Clarke GM, Cardon LR, Morris AP, Zondervan KT. Data quality control in genetic case-control association studies. *Nat Protoc* 2010; 5:1564-1573.
13. Purcell S, Neale B, Todd-Brown K, Thomas L, Ferreira MA, Bender D, Maller J, Sklar P, de Bakker PI, Daly MJ, Sham PC. PLINK: a tool set for whole-genome association and population-based linkage analyses. *Am J Hum Genet* 2007; 81:559-575.
14. Meda SA, Narayanan B, Liu J, Perrone-Bizzozero NI, Stevens MC, Calhoun VD, Glahn DC, Shen L, Risacher SL, Saykin AJ, Pearlson GD. A large scale multivariate parallel ICA method reveals novel imaging-genetic relationships for Alzheimer's disease in the ADNI cohort. *Neuroimage* 2012; 60:1608-1621.
15. Liu J, Demirci O, Calhoun VD. A parallel independent component analysis approach to Investigate genomic influence on brain function. *IEEE Signal Process Lett* 2008; 15:413-416.
16. Rissanen J. A universal prior for integers and estimation by minimum description length. *The Annals of Statistics* 1983; 11:16.
17. Calhoun VD, Adali T, Pearlson GD, Pekar JJ. A method for making group inferences from functional MRI data using independent component analysis. *Hum Brain Mapp* 2001; 14:140-151.
18. Chen J, Calhoun VD, Liu J. ICA order selection based on consistency: application to genotype data. *Conf Proc IEEE Eng Med Biol Soc* 2012; 2012:360-363.
19. Grant A, Fathalli F, Rouleau G, Joobar R, Flores C. Association between schizophrenia and genetic variation in DCC: a case-control study. *Schizophr Res* 2012; 137:26-31.

20. Kato T, Iwayama Y, Kakiuchi C, Iwamoto K, Yamada K, Minabe Y, Nakamura K, Mori N, Fujii K, Nanko S, Yoshikawa T. Gene expression and association analyses of LIM (PDLIM5) in bipolar disorder and schizophrenia. *Mol Psychiatry* 2005; 10:1045-1055.
21. Zhao T, Liu Y, Wang P, Li S, Zhou D, Zhang D, Chen Z, Wang T, Xu H, Feng G, He L, Yu L. Positive association between the PDLIM5 gene and bipolar disorder in the Chinese Han population. *J Psychiatry Neurosci* 2009; 34:199-204.
22. Squassina A, Manchia M, Manconi F, Piccardi M, Ardaù R, Chillotti C, Severino G, Del Zompo M. A case-control association study of the PDLIM5 gene and bipolar disorder in a Sardinian sample. *Psychiatr Genet* 2008; 18:128-132.
23. Liu Z, Liu W, Xiao Z, Wang G, Yin S, Zhu F, Wang H, Cheng J, Wang X, He X, Li W. A major single nucleotide polymorphism of the PDLIM5 gene associated with recurrent major depressive disorder. *J Psychiatry Neurosci* 2008; 33:43-46.
24. Lang B, Alrahbeni TM, Clair DS, Blackwood DH, McCaig CD, Shen S. HDAC9 is implicated in schizophrenia and expressed specifically in post-mitotic neurons but not in adult neural stem cells. *Am J Stem Cells* 2011; 1:31-41.
25. Goes FS, Zandi PP, Miao K, McMahon FJ, Steele J, Willour VL, Mackinnon DF, Mondimore FM, Schweizer B, Nurnberger JI, Jr., Rice JP, Scheftner W, Coryell W, Berrettini WH, Kelsoe JR, Byerley W, Murphy DL, Gershon ES, Bipolar Disorder Phenome G, Depaulo JR, Jr., McInnis MG, Potash JB. Mood-incongruent psychotic features in bipolar disorder: familial aggregation and suggestive linkage to 2p11-q14 and 13q21-33. *Am J Psychiatry* 2007; 164:236-247.
26. Djurovic S, Le Hellard S, Kahler AK, Jonsson EG, Agartz I, Steen VM, Hall H, Wang AG, Rasmussen HB, Melle I, Werge T, Andreassen OA. Association of MCTP2 gene variants with schizophrenia in three independent samples of Scandinavian origin (SCOPE). *Psychiatry Res* 2009; 168:256-258.
27. McAuley EZ, Blair IP, Liu Z, Fullerton JM, Scimone A, Van Herten M, Evans MR, Kirkby KC, Donald JA, Mitchell PB, Schofield PR. A genome screen of 35 bipolar affective disorder pedigrees provides significant evidence for a susceptibility locus on chromosome 15q25-26. *Mol Psychiatry* 2009; 14:492-500.
28. Verma R, Holmans P, Knowles JA, Grover D, Evgrafov OV, Crowe RR, Scheftner WA, Weissman MM, DePaulo JR, Jr., Potash JB, Levinson DF. Linkage disequilibrium mapping of a chromosome 15q25-26 major depression linkage region and sequencing of NTRK3. *Biol Psychiatry* 2008; 63:1185-1189.
29. Chagnon YC. Shared susceptibility region on chromosome 15 between autism and catatonia. *Int Rev Neurobiol* 2006; 72:165-178.
30. Chagnon YC. Shared chromosomal susceptibility regions between autism and other mental disorders. *Int Rev Neurobiol* 2005; 71:419-443.
31. Thiselton DL, Maher BS, Webb BT, Bigdeli TB, O'Neill FA, Walsh D, Kendler KS, Riley BP. Association analysis of the PIP4K2A gene on chromosome 10p12 and schizophrenia in the Irish study of high density schizophrenia families (ISHDSF) and the Irish case-control study of schizophrenia (ICCS). *Am J Med Genet B Neuropsychiatr Genet* 2010; 153B:323-331.
32. Ma X, Deng W, Liu X, Li M, Chen Z, He Z, Wang Y, Wang Q, Hu X, Collier DA, Li T. A genome-wide association study for quantitative traits in schizophrenia in China. *Genes Brain Behav* 2011; 10:734-739.
33. Walss-Bass C, Soto-Bernardini MC, Johnson-Pais T, Leach RJ, Ontiveros A, Nicolini H, Mendoza R, Jerez A, Dassori A, Chavarria-Siles I, Escamilla MA, Raventos H. Methionine sulfoxide reductase: a novel schizophrenia candidate gene. *Am J Med Genet B Neuropsychiatr Genet* 2009; 150B:219-225.
34. Walss-Bass C, Escamilla MA, Raventos H, Montero AP, Armas R, Dassori A, Contreras S, Liu W, Medina R, Balderas TG, Levinson D, Pereira R, Pereira M, Atmella I, Nesmith L, Leach R, Almasy L. Evidence of genetic overlap of schizophrenia and bipolar disorder: linkage disequilibrium

- analysis of chromosome 18 in the Costa Rican population. *Am J Med Genet B Neuropsychiatr Genet* 2005; 139B:54-60.
35. Gabbita SP, Aksenov MY, Lovell MA, Markesbery WR. Decrease in peptide methionine sulfoxide reductase in Alzheimer's disease brain. *J Neurochem* 1999; 73:1660-1666.
  36. Menashe I, Larsen EC, Banerjee-Basu S. Prioritization of Copy Number Variation Loci Associated with Autism from AutDB-An Integrative Multi-Study Genetic Database. *PLoS One* 2013; 8:e66707.
  37. Griggs BL, Ladd S, Saul RA, DuPont BR, Srivastava AK. Deducator of cytokines 8 is disrupted in two patients with mental retardation and developmental disabilities. *Genomics* 2008; 91:195-202.
  38. Hu X, Zhang J, Jin C, Mi W, Wang F, Ma W, Ma C, Yang Y, Li W, Zhang H, Du B, Li K, Liu C, Wang L, Lu T, Lv L, Zhang D, Yue W. Association study of NRXN3 polymorphisms with schizophrenia and risperidone-induced bodyweight gain in Chinese Han population. *Prog Neuropsychopharmacol Biol Psychiatry* 2013; 43:197-202.
  39. Vaags AK, Lionel AC, Sato D, Goodenberger M, Stein QP, Curran S, Ogilvie C, Ahn JW, Drmic I, Senman L, Chrysler C, Thompson A, Russell C, Prasad A, Walker S, Pinto D, Marshall CR, Stavropoulos DJ, Zwaigenbaum L, Fernandez BA, Fombonne E, Bolton PF, Collier DA, Hodge JC, Roberts W, Szatmari P, Scherer SW. Rare deletions at the neurexin 3 locus in autism spectrum disorder. *Am J Hum Genet* 2012; 90:133-141.
  40. Hishimoto A, Liu QR, Drgon T, Pletnikova O, Walther D, Zhu XG, Troncoso JC, Uhl GR. Neurexin 3 polymorphisms are associated with alcohol dependence and altered expression of specific isoforms. *Hum Mol Genet* 2007; 16:2880-2891.
  41. Liu Y, Zhang H, Ju G, Zhang X, Xu Q, Liu S, Yu Y, Shi J, Boyle S, Wang Z, Shen Y, Wei J. A study of the PEMT gene in schizophrenia. *Neurosci Lett* 2007; 424:203-206.
  42. Bi XH, Zhao HL, Zhang ZX, Zhang JW. PEMT G523A (V175M) is associated with sporadic Alzheimer's disease in a Chinese population. *J Mol Neurosci* 2012; 46:505-508.
  43. Li JM, Lu CL, Cheng MC, Luu SU, Hsu SH, Chen CH. Genetic analysis of the DLGAP1 gene as a candidate gene for schizophrenia. *Psychiatry Res* 2013; 205:13-17.
  44. Stewart SE, Yu D, Scharf JM, Neale BM, Fagerness JA, Mathews CA, Arnold PD, Evans PD, Gamazon ER, Osiecki L, McGrath L, Haddad S, Crane J, Hezel D, Illman C, Mayerfeld C, Konkashbaev A, Liu C, Pluzhnikov A, Tikhomirov A, Edlund CK, Rauch SL, Moessner R, Falkai P, Maier W, Ruhrmann S, Grabe HJ, Lennertz L, Wagner M, Bellodi L, Cavallini MC, Richter MA, Cook EH, Jr., Kennedy JL, Rosenberg D, Stein DJ, Hemmings SM, Lochner C, Azzam A, Chavira DA, Fournier E, Garrido H, Sheppard B, Umana P, Murphy DL, Wendland JR, Veenstra-Vanderweele J, Denys D, Blom R, Deforce D, Van Nieuwerburgh F, Westenberg HG, Walitza S, Egberts K, Renner T, Miguel EC, Cappi C, Hounie AG, Conceicao do Rosario M, Sampaio AS, Vallada H, Nicolini H, Lanzagorta N, Camarena B, Delorme R, Leboyer M, Pato CN, Pato MT, Voyiaziakis E, Heutink P, Cath DC, Posthuma D, Smit JH, Samuels J, Bienvenu OJ, Cullen B, Fyer AJ, Grados MA, Greenberg BD, McCracken JT, Riddle MA, Wang Y, Coric V, Leckman JF, Bloch M, Pittenger C, Eapen V, Black DW, Ophoff RA, Strengman E, Cusi D, Turiel M, Frau F, Macciardi F, Gibbs JR, Cookson MR, Singleton A, Arepalli S, Dillman A, Ferrucci L, Hernandez DG, Johnson R, Longo DL, Nalls MA, R OB, Traynor B, Troncoso J, van der Brug M, Zielke HR, Zonderman A, Hardy J, Hardy JA, Ryten M, Smith C, Trabzuni D, Walker R, Weale M, Crenshaw AT, Parkin MA, Mirel DB, Conti DV, Purcell S, Nestadt G, Hanna GL, Jenike MA, Knowles JA, Cox N, Pauls DL. Genome-wide association study of obsessive-compulsive disorder. *Mol Psychiatry* 2013; 18:788-798.
  45. Ishiguro H, Saito T, Shibuya H, Toru M, Arinami T. Mutation and association analysis of the Fyn kinase gene with alcoholism and schizophrenia. *Am J Med Genet* 2000; 96:716-720.
  46. Shirazi SK, Wood JG. The protein tyrosine kinase, fyn, in Alzheimer's disease pathology. *Neuroreport* 1993; 4:435-437.
  47. Wang KS, Liu X, Zhang Q, Aragam N, Pan Y. Parent-of-origin effects of FAS and PDLIM1 in attention-deficit/hyperactivity disorder. *J Psychiatry Neurosci* 2012; 37:46-52.

48. Grupe A, Li Y, Rowland C, Nowotny P, Hinrichs AL, Smemo S, Kauwe JS, Maxwell TJ, Cherny S, Doil L, Tacey K, van Luchene R, Myers A, Wavrant-De Vrieze F, Kaleem M, Hollingworth P, Jehu L, Foy C, Archer N, Hamilton G, Holmans P, Morris CM, Catanese J, Sninsky J, White TJ, Powell J, Hardy J, O'Donovan M, Lovestone S, Jones L, Morris JC, Thal L, Owen M, Williams J, Goate A. A scan of chromosome 10 identifies a novel locus showing strong association with late-onset Alzheimer disease. *Am J Hum Genet* 2006; 78:78-88.
49. Chapuis J, Hot D, Hansmannel F, Kerdraon O, Ferreira S, Hubans C, Maurage CA, Huot L, Bensemain F, Laumet G, Ayrat AM, Fievet N, Hauw JJ, DeKosky ST, Lemoine Y, Iwatsubo T, Wavrant-Devrieze F, Dartigues JF, Tzourio C, Buee L, Pasquier F, Berr C, Mann D, Lendon C, Alperovitch A, Kamboh MI, Amouyel P, Lambert JC. Transcriptomic and genetic studies identify IL-33 as a candidate gene for Alzheimer's disease. *Mol Psychiatry* 2009; 14:1004-1016.
50. Sim SC, Nordin L, Andersson TM, Viriding S, Olsson M, Pedersen NL, Ingelman-Sundberg M. Association between CYP2C19 polymorphism and depressive symptoms. *Am J Med Genet B Neuropsychiatr Genet* 2010; 153B:1160-1166.
51. Ishii G, Suzuki A, Oshino S, Shiraiishi H, Otani K. CYP2C19 polymorphism affects personality traits of Japanese females. *Neurosci Lett* 2007; 411:77-80.
52. Wang KS, Liu XF, Aragam N. A genome-wide meta-analysis identifies novel loci associated with schizophrenia and bipolar disorder. *Schizophr Res*; 124:192-199.
53. Ji W, Li T, Pan Y, Tao H, Ju K, Wen Z, Fu Y, An Z, Zhao Q, Wang T, He L, Feng G, Yi Q, Shi Y. CNTNAP2 is significantly associated with schizophrenia and major depression in the Han Chinese population. *Psychiatry Res* 2013; 207:225-228.
54. Terracciano A, Sanna S, Uda M, Deiana B, Usala G, Busonero F, Maschio A, Scally M, Patriciu N, Chen WM, Distel MA, Slagboom EP, Boomsma DI, Villafuerte S, Sliwerska E, Burmeister M, Amin N, Janssens AC, van Duijn CM, Schlessinger D, Abecasis GR, Costa PT, Jr. Genome-wide association scan for five major dimensions of personality. *Mol Psychiatry* 2010; 15:647-656.
55. Li X, Hu Z, He Y, Xiong Z, Long Z, Peng Y, Bu F, Ling J, Xun G, Mo X, Pan Q, Zhao J, Xia K. Association analysis of CNTNAP2 polymorphisms with autism in the Chinese Han population. *Psychiatr Genet* 2010; 20:113-117.
56. Alarcon M, Abrahams BS, Stone JL, Duvall JA, Perederiy JV, Bomar JM, Sebat J, Wigler M, Martin CL, Ledbetter DH, Nelson SF, Cantor RM, Geschwind DH. Linkage, association, and gene-expression analyses identify CNTNAP2 as an autism-susceptibility gene. *Am J Hum Genet* 2008; 82:150-159.
57. Elia J, Gai X, Xie HM, Perin JC, Geiger E, Glessner JT, D'Arcy M, deBerardinis R, Frackelton E, Kim C, Lantieri F, Muganga BM, Wang L, Takeda T, Rappaport EF, Grant SF, Berrettini W, Devoto M, Shaikh TH, Hakonarson H, White PS. Rare structural variants found in attention-deficit hyperactivity disorder are preferentially associated with neurodevelopmental genes. *Mol Psychiatry* 2010; 15:637-646.
58. Mailman MD, Feolo M, Jin Y, Kimura M, Tryka K, Bagoutdinov R, Hao L, Kiang A, Paschall J, Phan L, Popova N, Pretel S, Ziyabari L, Lee M, Shao Y, Wang ZY, Sirotkin K, Ward M, Kholodov M, Zbicz K, Beck J, Kimelman M, Shevelev S, Preuss D, Yaschenko E, Graeff A, Ostell J, Sherry ST. The NCBI dbGaP database of genotypes and phenotypes. *Nat Genet* 2007; 39:1181-1186.
